# Supplementary material for: Assessment of Dietary Sodium Intake Using the Scored Salt Questionnaire in Autosomal Dominant Polycystic Kidney Disease
Source: MDPI journal article supplement (doi:10.3390/nu12113376), 2020-11-02
Supplement: s1 [file s1]

Supplementary Material

**Table S1.** Characteristics of the study population subdivided according to the completeness of the urine collection.

| Parameter                         | Complete 24-hr Urine Collection<br>(n=75) | Under-Collection of 24-hr Urine<br>(n=21) | Over-collection of 24-hr Urine<br>(n=13) |
|-----------------------------------|-------------------------------------------|-------------------------------------------|------------------------------------------|
| Age (years)                       | 44.6±11.5                                 | 45.1±9.8                                  | 39.8±10.8                                |
| Gender (F:M) (%)                  | 53:47                                     | 81:19*                                    | 38:62                                    |
| Height (m)                        | 1.71±0.09                                 | 1.65±0.10*                                | 1.73±0.08                                |
| Weight (kg)                       | 76.1±15.1                                 | 82.1±21.3                                 | 73.9±14.1                                |
| BMI (kg/m <sup>2</sup> )          | 25.9±3.8                                  | 30.1±6.2*                                 | 24.5±3.5                                 |
| Systolic BP (mm Hg)               | 133±14                                    | 134±15                                    | 131±15                                   |
| Diastolic BP (mm Hg)              | 85±11                                     | 86±12                                     | 81±8                                     |
| Serum Cr (mmol/L)                 | 91 (70-123)                               | 88 (61-105)                               | 88 (78-104)                              |
| eGFR (mL/min/1.73m <sup>2</sup> ) | 75 (53-105)                               | 80 (55-109)                               | 89 (75-97)                               |
| 24-hr urine Na (mmol/day)         | 132 (112-172)                             | 99 (86-151)                               | 183 (128-261)*                           |
| 24-hr urine Cr (mmol/day)         | 13.1±3.4                                  | 9.1±2.9*                                  | 17.7±3.4*                                |

Abbreviations: Na, sodium; BMI, body mass index; BP, blood pressure; Cr, creatinine; eGFR, estimated glomerular filtration calculated using the Chronic Kidney Disease Epidemiology Collaboration equation. Data expressed as mean±SD with exception of serum Cr, eGFR and 24-hr urine Na which are presented as median with inter-quartile range; \**p* < 0.05 compared to the Complete Urine Collection group.

**Table S2.** Median absolute values of each of the nine sodium-rich food types from the SSQ.

| Sodium-Rich Food Groups          | SSQ Score by Food Type (All)<br>n=75 | SSQ Score by Food Type (SSQ<74)<br>n=34 | SSQ Score by Food Type (SSQ≥74)<br>n=41 | P     |
|----------------------------------|--------------------------------------|-----------------------------------------|-----------------------------------------|-------|
| 1. Breads                        | 15 (15-15)                           | 15 (0-15)                               | 15 (15-15)*                             | 0.01  |
| 2. Spreads                       | 4.5 (2-7)                            | 4 (0.38-6)                              | 5.5 (4-7.3)*                            | 0.01  |
| 3. Cereals, biscuits and baking  | 6 (4-8)                              | 5.8 (4-8.3)                             | 6.5 (5-8)                               | 0.39  |
| 4. Cheeses and Savory Snacks     | 7 (5-8.5)                            | 5 (4-7.6)                               | 8 (6-9.5)*                              | <0.01 |
| 5. Tinned and packet foods       | 2 (0.5-4)                            | 1.25 (0-3)                              | 3 (1-4.5)*                              | 0.03  |
| 6. Processed meats and seafood   | 12 (2-20)                            | 6.5 (1.5-12.3)                          | 20 (10-22)*                             | <0.01 |
| 7. Flavorings added in cooking   | 15 (7-21)                            | 7.5 (1.8-12.8)                          | 21 (14.5-25)*                           | <0.01 |
| 8. Flavorings added at the table | 7 (3.5-10)                           | 4.5 (2.9-7)                             | 9 (6-13.8)*                             | <0.01 |
| 9. Pre-prepared meals and drinks | 5 (2-6)                              | 3.8 (1.6-5)                             | 5 (4-7.8)*                              | <0.01 |
| Total SSQ Score                  | 77 (58-90)                           | 55.8 (42-67)                            | 89 (81-94.8)*                           | <0.01 |

Abbreviations: SSQ, scored salt questionnaire; Data expressed as median values with interquartile ranges in brackets; P value comparing SSQ≥74 vs. SSQ<74 and asterisks denotes *p* < 0.05.

**Table S3.** Median relative percentages of each of the nine sodium-rich food types from the SSQ.

| <b>Sodium-Rich Food Groups</b>   | <b>Percentage Contribution (All)<br/><i>n</i>=75</b> | <b>Percentage Contribution (SSQ&lt;74)<br/><i>n</i>=34</b> | <b>Percentage Contribution (SSQ≥74)<br/><i>n</i>=41</b> | <b><i>P</i></b> |
|----------------------------------|------------------------------------------------------|------------------------------------------------------------|---------------------------------------------------------|-----------------|
| 1. Breads                        | 19.0 (15.3-25.4)                                     | 22.4 (0-32.1)                                              | 17.4 (15.9-19.5)*                                       | 0.03            |
| 2. Spreads                       | 6.3 (4.0-8.5)                                        | 6.5 (2.2-10.1)                                             | 6.3 (4.2-7.4)                                           | 0.44            |
| 3. Cereals, biscuits and baking  | 8.2 (6.1-12.7)                                       | 11.6 (7.2-15.8)                                            | 7.4 (6-9.1)*                                            | <0.01           |
| 4. Cheeses and Savory Snacks     | 9.1 (7.1-12.2)                                       | 11.8 (7.3-15.2)                                            | 8.7 (7.0-10.3)*                                         | <0.05           |
| 5. Tinned and packet foods       | 3.4 (0.9-5.4)                                        | 3.2 (0-6.9)                                                | 3.5 (1.3-4.9)                                           | 0.86            |
| 6. Processed meats and seafood   | 17.0 (4.9-25.5)                                      | 12.0 (2.1-21.2)                                            | 20.4 (12.9-25.7)*                                       | 0.02            |
| 7. Flavorings added in cooking   | 19.5 (9.9-26.7)                                      | 12.2 (3.6-20.6)                                            | 22.3 (15.5-27.3)*                                       | <0.01           |
| 8. Flavorings added at the table | 9.4 (6-14.6)                                         | 8.9 (4.2-14.6)                                             | 9.4 (6.7-14.4)                                          | 0.39            |
| 9. Pre-prepared meals and drinks | 6.2 (3.6-8.5)                                        | 6.4 (2.4-8.6)                                              | 5.8 (4.8-8.3)                                           | 0.98            |

Abbreviations: SSQ, scored salt questionnaire; Data expressed as median values with interquartile ranges in brackets; P value comparing SSQ≥74 vs. SSQ<74 and asterisks denotes  $p < 0.05$ .
